# Supplementary material for: Identifying Patients With Advanced Heart Failure Using Administrative Data
Source: PubMed Central journal article supplement — Mayo Clin Proc Innov Qual Outcomes. 2022 Mar 29;6(2):148–55. doi: 10.1016/j.mayocpiqo.2022.02.001 (PMC8968660; doi:10.1016/j.mayocpiqo.2022.02.001), 2022-03-29
Supplement: mmc1.pdf [file mmc1.pdf]

## Supplemental Material

**Supplemental Table. Selected Algorithm Performance Stratified by Age, Gender, and Race/ Ethnicity**

| Group                               | Algorithm* | Sensitivity | Specificity | Positive Predictive Value | Negative Predictive Value |
|-------------------------------------|------------|-------------|-------------|---------------------------|---------------------------|
| Men<br>N=4347                       | 1          | 100%        | 64.6%       | 38.8%                     | 100%                      |
|                                     | 2          | 76.4%       | 88.4%       | 62.0%                     | 93.8%                     |
|                                     | 3          | 75.5%       | 88.9%       | 62.8%                     | 93.6%                     |
| Women<br>N=4309                     | 1          | 100%        | 67.3%       | 33.4%                     | 100%                      |
|                                     | 2          | 70.7%       | 90.2%       | 56.5%                     | 94.5%                     |
|                                     | 3          | 68.8%       | 90.8%       | 57.3%                     | 94.2%                     |
| <65 years old<br>N=2084             | 1          | 100%        | 67.0%       | 42.3%                     | 100%                      |
|                                     | 2          | 80.9%       | 87.8%       | 64.0%                     | 94.5%                     |
|                                     | 3          | 79.9%       | 88.6%       | 65.3%                     | 94.3%                     |
| 65 and older<br>N=6573              | 1          | 100%        | 65.6%       | 34.3%                     | 100%                      |
|                                     | 2          | 71.0%       | 89.8%       | 57.7%                     | 94.0%                     |
|                                     | 3          | 69.5%       | 90.2%       | 58.3%                     | 93.8%                     |
| Non-Hispanic white<br>N=7769        | 1          | 100%        | 66.1%       | 35.6%                     | 100%                      |
|                                     | 2          | 73.3%       | 89.6%       | 59.0%                     | 94.2%                     |
|                                     | 3          | 72.2%       | 90.1%       | 59.9%                     | 94.1%                     |
| Hispanic and/ or non-white<br>N=888 | 1          | 100%        | 64.8%       | 42.4%                     | 100%                      |
|                                     | 2          | 78.2%       | 86.7%       | 63.4%                     | 93.1%                     |
|                                     | 3          | 75.7%       | 87.7%       | 64.4%                     | 92.5%                     |

\*Algorithm 1 is 1 hospitalization for heart failure or ventricular arrhythmias (HF/VA); algorithm 2 is 2 hospitalizations for HF/VA within 1 year; algorithm 3 is 2 hospitalizations for HF/VA plus 1 sign of advanced HF within 1 year
